# Supplementary material for: Reversible photoswitching of the DNA-binding properties of styrylquinolizinium derivatives through photochromic [2 + 2] cycloaddition and cycloreversion
Source: publisher site journal article supplement (doi:10.3762/bjoc.16.13), 2020-01-23
Supplement: Additional file 1 [file 1860-5397-16-13-S1.pdf]

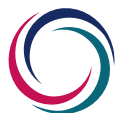

## Supporting Information

for

### **Reversible photoswitching of the DNA-binding properties of styrylquinolinizinium derivatives through photochromic [2 + 2] cycloaddition and cycloreversion**

Sarah Kölsch, Heiko Ihmels, Jochen Mattay, Norbert Sewald and Brian O. Patrick

*Beilstein J. Org. Chem.* **2020**, *16*, 111–124. [doi:10.3762/bjoc.16.13](https://doi.org/10.3762/bjoc.16.13)

**Additional spectroscopic data, detailed experimental procedures,  $^1\text{H}$  NMR spectra, and crystallographic data**

# Table of Contents

|                                                                     |     |
|---------------------------------------------------------------------|-----|
| Equipment                                                           | S2  |
| Synthesis                                                           | S2  |
| Absorption and Emission Spectroscopy                                | S4  |
| Circular Dichroism (CD) and Flow Linear Dichroism (LD) Spectroscopy | S5  |
| Photometric Monitoring of Photoreactions                            | S6  |
| Crystallographic Data                                               | S7  |
| $^1\text{H}$ NMR spectra                                            | S11 |
| References                                                          | S15 |

## Equipment

X-ray diffraction analysis: Bruker APEX II area detector diffractometer equipped with a Kryoflex low-temperature device operating at  $T = 100(2)$  K. NMR spectroscopy: Bruker AV 400 ( $^1\text{H}$ : 400 MHz;  $^{13}\text{C}$ : 100 MHz), Jeol ECZ 500 ( $^1\text{H}$ : 500 MHz;  $^{13}\text{C}$ : 125 MHz), Varian 600 ASC ( $^1\text{H}$ : 600 MHz;  $^{13}\text{C}$ : 150 MHz). Spectra are determined at ca. 20 °C. Chemical shifts are given in ppm ( $\delta$ ) values and are calibrated relative to the residual solvent peaks. Elemental analyses: HEKAtech EUROEA combustion analyser, determined by Mr. Rochus Breuer (Universität Siegen, Organische Chemie I). Mass spectra (ESI): Finnigan LCQ Deca ( $U = 6$  kV; working gas: argon; auxiliary gas: nitrogen; temperature of the capillary: 200 °C). Absorption spectra: Varian Cary 100; fluorescence emission spectra: Varian Cary Eclipse; CD and LD spectra: Chirascan (Applied Photophysics). Melting points: BÜCHI 510 (BÜCHI, Flawil, CH). pH values: pH meter Qph 70, VWR. Photoreactions: Power LED lamp P7QC (LED LENSER) or high-pressure Hg lamp TQ 150 (Heraeus).

## Synthesis

### General procedure 1 (GP1) for the synthesis of 2-styrylquinolizinium derivatives **3a–d**

A solution of 2-methylquinolizinium tetrafluoroborate (**1**, 1.00 mmol) [1], the corresponding aldehyde (1.30 mmol), and piperidine (1.30 mmol) in MeCN (10 mL) was stirred under an argon gas atmosphere at 85 °C for 2–5 h. After cooling the solution to 20 °C, diethyl ether (30 mL) was added, the precipitate was isolated by filtration and washed with diethyl ether (30 mL). The product was crystallized from MeOH/EtOAc.

**(E)-2-(4'-(Dimethylamino)styryl)quinolizinium tetrafluoroborate (3a)** [2]: According to GP1, a solution of **1** (231 mg, 1.00 mmol), 4-dimethylaminobenzaldehyde (**2a**, 193 mg, 1.30 mmol), and piperidine (111 mg, 1.30 mmol, 129  $\mu\text{L}$ ) in EtOH was stirred for 5 h. The product **3a** was obtained as red prisms (228 g, 639  $\mu\text{mol}$ , 64%); mp >300 °C. –  $^1\text{H}$  NMR (400 MHz, DMSO- $d_6$ ):  $\delta$  = 3.01 (s, 6 H,  $\text{CH}_3$ ), 6.79 (d,  $^3J = 9$  Hz, 2 H), 7.22 (d,  $^3J = 16$  Hz, 1 H), 7.59 (d,  $^3J = 9$  Hz, 2 H), 7.81–7.86 (m, 2 H), 8.19 (t,  $^3J = 8$  Hz, 1 H), 8.29–8.31 (m, 2 H), 8.35 (s, 1 H, H1), 9.08 (d,  $^3J = 7$  Hz, 1 H), 9.13 (d,  $^3J = 7$  Hz, 1 H).

**(E)-2-(3',4'-Dimethoxystyryl)quinolizinium tetrafluoroborate (3b)**: According to the GP1, a solution of **1** (231 mg, 1.00 mmol), 3,4-dimethoxybenzaldehyde (**2b**, 197 mg, 1.30 mmol), and piperidine (111 mg, 1.30 mmol, 129  $\mu\text{L}$ ) in EtOH was stirred for 2 h. The product **3b** was obtained as yellow needles (239 mg, 632  $\mu\text{mol}$ , 63%); mp 214–215 °C (decomp.). –  $^1\text{H}$  NMR (600 MHz,  $\text{CD}_3\text{CN}$ ):  $\delta$  = 3.85 (s, 3 H, OMe), 3.88 (s, 3 H, OMe), 6.97 (d,  $^3J = 8.0$  Hz, 1 H, 5''-H), 7.20 (dd,  $^3J = 8.0$  Hz, 1 H, 6''-H), 7.24 (d,  $^3J = 16$  Hz, 1 H, 1'-H), 7.26 (s, 1 H, 2''-H), 7.65 (d,  $^3J = 16$  Hz, 1 H, 2'-H), 7.75 (dt,  $^3J = 7$  Hz,  $^4J = 1$  Hz, 1 H, 6-H), 8.07 (dd,  $^3J = 7$  Hz,  $^4J = 2$  Hz, 1 H, 3-H), 8.12 (d,  $^3J = 7$  Hz, 1 H, 7-H), 8.18 (s, 1 H, 1-H), 8.20 (d,  $^3J = 9$  Hz, 1 H, 8-H), 8.78–8.81 (m, 2 H, C4, 5-H). –  $^{13}\text{C}$  NMR (150 MHz,  $\text{CD}_3\text{CN}$ ):  $\delta$  = 56.5 (2 x OMe), 110.7 (C1'), 112.6 (C5''), 121.6 (C3''), 122.0 (C2''), 123.3 (C1''), 123.6 (C6), 123.7 (C6''), 127.9 (C8), 129.4 (C1), 137.1 (C4 & C5), 137.7 (C7), 140.2 (C2'), 144.5 (C8a), 147.4 (C2), 150.6 (C3''), 152.4 (C4''). – MS (ESI<sup>+</sup>):  $m/z$  (%) = 292 (100) [ $\text{M}^+$ ]. – El. Anal. for  $\text{C}_{19}\text{H}_{18}\text{BF}_4\text{NO}_2$  (379.16), calcd (%): C 60.19, H 4.79%, N 3.69; found (%): C 60.0, H 4.46, N 3.96.

**(E)-2-(4'-(Methoxy)styryl)quinolizinium tetrafluoroborate (3c)** [2]: According to GP1, a solution of **1** (100 mg, 433  $\mu$ mol), 4-methoxybenzaldehyde (**2c**, 70.7 mg, 519  $\mu$ mol), and piperidine (51.3  $\mu$ L, 44.2 mg, 519  $\mu$ mol) in EtOH was stirred for 2 h. The product **3c** was obtained as yellow needles (130 mg, 342  $\mu$ mol, 79%). mp 184–186 °C –  $^1\text{H}$  NMR (400 MHz, DMSO- $d_6$ ):  $\delta$  = 3.83 (s, 3 H, OMe), 7.05–7.06 (m,  $^3J$  = 9 Hz, 2 H, 3''-H, 5''-H), 7.41 (d,  $^3J$  = 16 Hz, 1 H, 1'-H), 7.73 (d,  $^3J$  = 9 Hz, 2 H, 2''-H, 6''-H), 7.91 (d,  $^3J$  = 16 Hz, 1 H, 2'-H), 7.95 (dd,  $^3J$  = 7,  $^4J$  = 2 Hz, 1 H, 3-H), 8.25–8.29 (m,  $^3J$  = 7,  $^3J$  = 9 Hz,  $^4J$  = 1 Hz, 1 H, 7-H), 8.38 (d,  $^3J$  = 7 Hz, 1 H, 8-H), 8.41 (d,  $^3J$  = 9 Hz, 1 H, 9-H), 8.49 (s, 1 H, 1-H), 9.20 (d,  $^3J$  = 7 Hz, 1 H, 4-H), 9.26 (d,  $^3J$  = 7 Hz, 1 H, 6-H). –  $^{13}\text{C}$  NMR (100 MHz, DMSO- $d_6$ ):  $\delta$  = 55.4 (OMe), 114.5 (C2'', C5''), 120.2 (C9), 121.3 (C1'), 122.2 (C1), 122.4 (C3), 123.4 (C2), 136.4 (C4), 136.7 (C6), 137.4 (C7), 138.4 (C2'), 142.8 (C9a), 142.8 (C1''), 160.8 (C4''). – MS (ESI $^+$ ):  $m/z$  (%) = 262 (100) [ $\text{M}^+$ ]. – El. Anal. for  $\text{C}_{18}\text{H}_{16}\text{BF}_4\text{NO}$  (349.14), calcd (%): 61.9; H 4.62, N 4.01; found (%): C 62.09, H 4.59, N 4.39.

**(E)-2-(4'-(Nitro)styryl)quinolizinium tetrafluoroborate (3d)**: According to GP1, a solution of **1** (231 mg, 1.00 mmol), 4-nitrobenzaldehyde (**2d**, 197 mg, 1.30 mmol), and piperidine (111 mg, 1.30 mmol, 129  $\mu$ L) in EtOH was stirred for 4 h. The product **3d** was obtained as yellow needles (289 mg, 764  $\mu$ mol, 76%), mp 244–246 °C (decomp.). –  $^1\text{H}$  NMR (600 MHz,  $\text{CD}_3\text{CN}$ ):  $\delta$  = 7.55 (d,  $^3J$  = 16 Hz, 1 H, 1'-H), 7.79 (d,  $^3J$  = 16 Hz, 1 H, 2'-H), 7.86–7.88 (m, 2 H, 8-H), 7.87 (d,  $^3J$  = 9 Hz, 1 H, 2''-H, 6''-H), 8.17 (dd,  $^3J$  = 7 Hz,  $^4J$  = 2 Hz, 1 H, 3-H), 8.21–8.24 (m, 1 H, 7-H), 8.25 (d,  $^3J$  = 7 Hz, 2 H, 3''-H, 5''-H), 8.31 (d,  $^3J$  = 9 Hz, 1 H, 9-H), 8.37 (s, 1 H, 1-H), 8.89–8.91 (m, 2 H, 4-H, 6-H). –  $^{13}\text{C}$  NMR (150 MHz,  $\text{CD}_3\text{CN}$ ):  $\delta$  = 122.0 (C3''), 124.7 (C8), 125.4 (C1), 125.5 (C3), 128.5 (C9), 128.6 (C1'), 129.8 (C2'', C6''), 137.3 (C2'), 137.7 (C4, C6), 138.5 (C7), 142.9 (C1''), 144.6 (C9a), 145.8 (C2), 149.4 (C4''). – MS (ESI $^+$ ):  $m/z$  (%) = 277 (100) [ $\text{M}^+$ ]. – El. Anal. for  $\text{C}_{17}\text{H}_{13}\text{BF}_4\text{N}_2\text{O}_2$  (364.11), calc. (%): C 54.73, H 3.78, N 7.51; found (%): C 55.09, H 3.35, N 7.35.

## General procedure 2 (GP2) for the photodimerization of 2-styrylquinolizinium derivatives **3b** and **3c**

A suspension of the styrylquinolizinium derivative (0.50 mmol) in  $\text{H}_2\text{O}$  (150 mL) was irradiated at ca. 450 nm for 6 h with thorough stirring. The product was extracted with  $\text{MeNO}_2$  (3  $\times$  70 mL), and the organic layers were combined and dried with  $\text{Na}_2\text{SO}_4$ . After filtration, the filtrate was concentrated in vacuum. The product was precipitated from  $\text{MeNO}_2$  using  $\text{Et}_2\text{O}$  and recrystallized from MeOH or  $\text{H}_2\text{O}$ .

**2,2-((1R,2S,3R,4S)-2,4-Bis(3'',4''-dimethoxyphenyl)cyclobutane-1,3-diyl)bis(quinolizinium) bis(tetrafluoroborate) (4b)**: According to GP2, **3b** (150 mg, 396  $\mu$ mol) was irradiated, and the product **4b** was obtained by recrystallization from  $\text{H}_2\text{O}$  as cubic pale yellow crystals (>99%); mp 167–170 °C. –  $^1\text{H}$  NMR (600 MHz, DMSO- $d_6$ ):  $\delta$  = 3.60 (s, 6 H, OMe'), 3.62 (s, 6 H, OMe), 4.89 (dd,  $^3J$  = 10 Hz,  $^3J$  = 10 Hz, 2 H, 2'-H), 5.00 (dd,  $^3J$  = 10 Hz,  $^3J$  = 10 Hz, 2 H, 1'-H), 6.75 (d,  $^3J$  = 8 Hz, 2 H, 5''-H), 6.86 (dd,  $^3J$  = 8 Hz,  $^4J$  = 2 Hz, 2 H, 6''-H), 6.90 (d,  $^4J$  = 2 Hz, 2 H, 2''-H), 7.93 (dd,  $^3J$  = 7 Hz,  $^4J$  = 2 Hz, 2 H, 3-H), 8.01 (dt,  $^3J$  = 7 Hz,  $^4J$  = 2 Hz, 2 H, 7-H), 8.32–8.34 (m, 2 H, 8-H), 8.40–8.42 (m, 2 H, 9-H), 8.51 (s, 2 H, 1-H), 9.15 (dd,  $^3J$  = 7 Hz, 4 H, 4-H, 6-H). –  $^{13}\text{C}$  NMR (150 MHz, DMSO- $d_6$ ):  $\delta$  = 45.3 (2  $\times$  C2'), 46.2 (2  $\times$  C1'), 55.3 (2  $\times$  OMe'), 55.5 (2  $\times$  OMe), 111.4 (2  $\times$  C5''), 112.1 (2  $\times$  C2''), 119.9 (2  $\times$  C6''), 123.2 (2  $\times$  C7), 124.2 (2  $\times$  C3), 124.6 (2  $\times$  C1), 126.3 (2  $\times$  C9), 130.5 (2  $\times$  C1''), 135.8 (2  $\times$  C4), 136.5 (2  $\times$  C6), 137.1 (2  $\times$  C8), 141.8 (2  $\times$  C9a), 147.6 (2  $\times$

C4''), 148.4 (2 x C3''), 151.3 (2 x C2). – MS (ESI<sup>+</sup>):  $m/z$  (%) = 671 (100) [M<sup>2+</sup> BF<sub>4</sub><sup>-</sup>]. – El. Anal. for C<sub>38</sub>H<sub>36</sub>B<sub>2</sub>F<sub>8</sub>N<sub>2</sub>O<sub>4</sub> × H<sub>2</sub>O (776.34), calc (%): C 58.79, H 4.93, N 3.61; found: C 58.45, H 4.47, N 3.71.

**2,2'-((1*R*,2*R*,3*R*,4*R*)-2,4-Bis(4-methoxyphenyl)cyclobutane-1,3-diyl)bis(quinolizinium)**

**bis(tetrafluoroborate) (4c):** According to GP2, **3c** (150 mg, 429 μmol) was irradiated and the product was obtained as pale yellow needles (120 mg, 343 μmol, 80%), mp 211–213 °C. –<sup>1</sup>H NMR (500 MHz, DMSO-*d*<sub>6</sub>): δ = 3.56 (s, 6 H, OMe), 4.56 (dd, <sup>3</sup>*J* = 10 Hz, 2 H, 2-H, 4-H), 4.95 (dd, <sup>3</sup>*J* = 10 Hz, 2 H, 1-H, 3-H), 6.72 (dd, <sup>3</sup>*J* = 10 Hz, 4 H, 3''-H, 5''-H), 7.20 (dd, <sup>3</sup>*J* = 6 Hz, 4 H, 2''-H, 6''-H), 7.83 (d, <sup>3</sup>*J* = 2 Hz, 2 H, 3'-H), 7.91 (d, <sup>3</sup>*J* = 5 Hz, 2 H, 9'-H), 8.33 (dd, <sup>3</sup>*J* = 5 Hz, 2 H, 8'-H), 8.41 (dd, <sup>3</sup>*J* = 5 Hz, 2 H, 7'-H), 8.45 (s, 2 H, 1'-H), 9.00 (d, <sup>3</sup>*J* = 10 Hz, 2 H, 4'-H), 9.12 (d, <sup>3</sup>*J* = 10 Hz, 2 H, 6'-H). –<sup>13</sup>C-NMR (125 MHz, DMSO-*d*<sub>6</sub>): δ = 45.5 (2 C, C2, C4), 46.9 (2 C, C1, C3), 55.3 (2 C, OMe), 114.0 (4 C, C3'', C5''), 123.6 (2 C, C9'), 124.0 (2 C, C3'), 126.7 (2 C, C7'), 127.0 (2 C, C8'), 127.4 (2 C, C1'), 130.0 (4 C, C2'', C6''), 136.2 (2 C, C4'), 136.9 (2 C, C6'), 137.0 (2 C, C4''), 142.0 (2 C, C1''), 151.9 (2 C, C2'), 158.5 (2 C, C9a'). – El. Anal. for C<sub>36</sub>H<sub>32</sub>B<sub>2</sub>F<sub>8</sub>N<sub>2</sub>O (698.27), calc. (%): C 61.92, H 4.62, N 4.01; found (%): C 62.00, H 4.37, N 4.16.

## Absorption and Emission Spectroscopy

### Preparation of solutions for spectrometric analyses

The ct DNA was dissolved in BPE buffer and stored at 4 °C for at least 24 h and filtered. The concentration (in base pairs, bp) was determined photometrically ( $\lambda_{\text{max}}$  = 260 nm,  $\epsilon$  = 12824 cm<sup>-1</sup>·M<sup>-1</sup>).

BPE buffer was prepared from biochemistry-grade chemicals (Fluka BioChemika Ultra) and e-pure water:  $c$  = 6.0 mM Na<sub>2</sub>HPO<sub>4</sub>,  $c$  = 2.0 mM NaH<sub>2</sub>PO<sub>4</sub>, and  $c$  = 1.0 mM Na<sub>2</sub>EDTA;  $c$  = 16 mM total Na<sup>+</sup>. Prior to use, the buffer solutions were filtered through a PVDF membrane filter (pore size 0.45 μm).

Stock solutions were prepared by dissolving **3a–d** in acetonitrile or water (**4b**) to give a concentration of 1.0 mM. The solutions were stored at 4 °C. All measurements were performed in thermostated quartz cuvettes with a path length of  $d$  = 1 cm at 20 °C, if not stated otherwise.

The absorption and emission spectra were recorded with a scan rate of 120 nm/min. The detection wavelength range of the absorption spectra was 200–600 nm with slit widths of 2 nm, and the recorded range of the emission spectra was 400–800 nm. Every experiment was performed at least two times. The fluorescence spectra were recorded with a detection voltage of  $U$  = 700 V and an excitation and emission slit of 5 nm, if not stated otherwise. The excitation wavelength for **3a** was at the isosbestic point at  $\lambda$  = 370 nm, the excitation wavelength of **3b** was  $\lambda$  = 410 nm and **3c**  $\lambda$  = 404 nm.

Aliquots of the stock solutions of compounds **3a–d** were pipetted in graduated flasks. The solvent was evaporated and the residue was dissolved in BPE buffer (2.0 mL) to obtain the required concentration. The titrant solution with ct DNA ( $c$  = 1.0–2.5 mM) contained the same concentration of ligand as the analyte solution. The analytes (1.0–2.0 mL) were pipetted into the quartz cuvettes and titrated with the titrant solutions in 0.25–20 equivalent intervals until no changes in absorption or fluorescence intensity were observed.

The binding constants were determined according to published procedures [3] from the spectrophotometric titrations (Figure S1) and fitting of the experimental binding to a theoretical

model considering noncompetitive binding [3], respectively (Figure S1A–C). Standard deviations (SD) of  $K_b$  values were calculated from Equation 1.

$$\text{SD} (K_b) = ((\text{SD of } A/A)/A)/c_{\text{lig}} \quad (1)$$

SD = standard deviation

A = value of the absorption

SD of A is used as provided by the Origin 7.5 software.

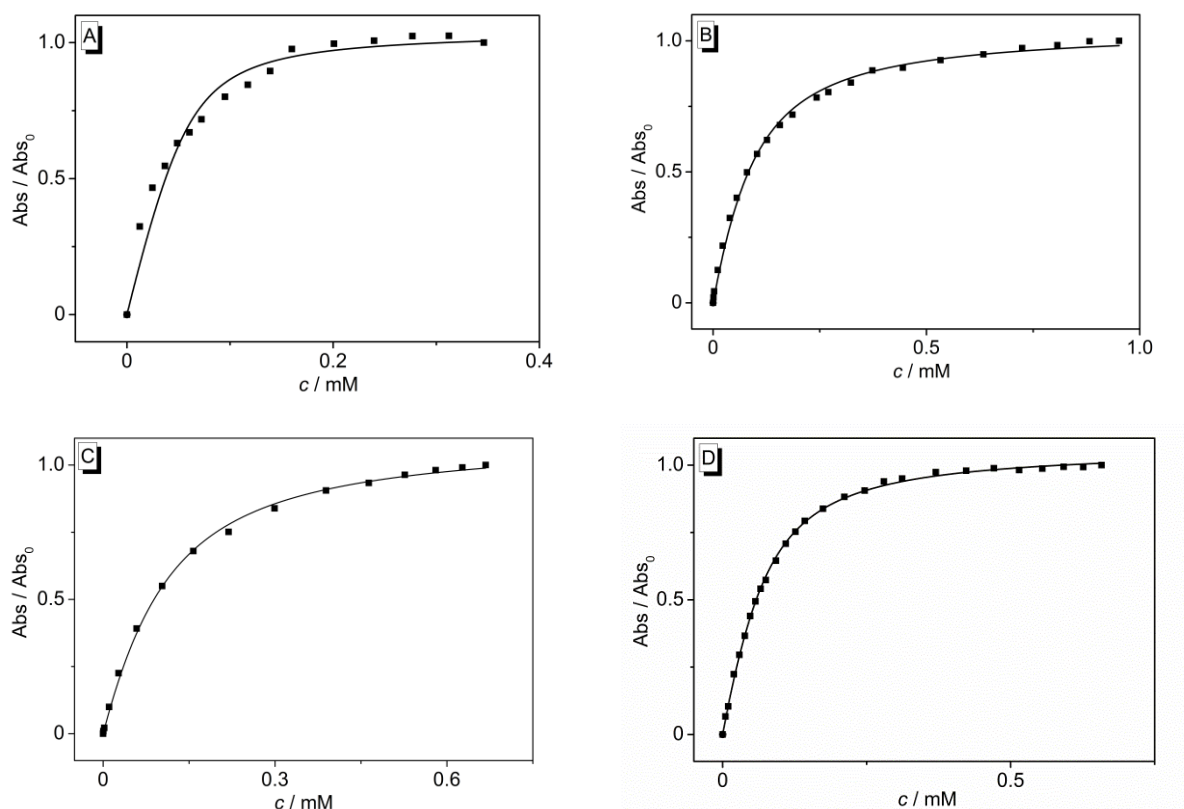

**Figure S1:** Plots of normalized absorption vs ct DNA concentration and the corresponding fitting of the experimental data to the theoretical model (A: **3a**, B: **3b**, C: **3c**; D: **3d**).

Fluorescence quantum yields of derivatives **3a–d** in acetonitrile solutions were determined according to published procedures [4].

## Circular Dichroism (CD) and Flow Linear Dichroism (LD) Spectroscopy

The analyte solutions were prepared by pipetting different aliquots of the stock solution of the ligands into Eppendorf vials and then the solvent was removed. Buffer solution and a solution of ct DNA in BPE buffer were added to adjust the concentration and the ligand–DNA values. The

spectra were recorded at  $\lambda = 230\text{--}600\text{ nm}$  with a band width of  $1\text{ nm}$  and a scan rate of  $1\text{ nm}\cdot\text{s}^{-1}$  with a time per point of  $0.5\text{ s}$ . The samples were recorded three times and averaged. The spectra were smoothed with the Savitzky–Golay method and implemented in the Chirscan software, with a polynomial order of 5.

## Photometric Monitoring of Photoreactions

Aliquots of the stock solutions of compounds **3a–d** were pipetted in Eppendorf vials, the solvent was evaporated, and the residue was dissolved in MeCN or H<sub>2</sub>O to obtain a final concentration of  $c = 20\text{--}25\text{ }\mu\text{M}$ . The samples were irradiated at ca.  $530\text{ nm}$  (**3a**) and ca.  $450\text{ nm}$  (**3b**, **3c**) with an LED lamp or a high-pressure Hg lamp with cut-off filter ( $>395\text{ nm}$ , **3d**). The reactions were monitored photometrically with a scan rate of  $120\text{ nm/min}$  in a range of  $200\text{--}600\text{ nm}$  (Figure S2).

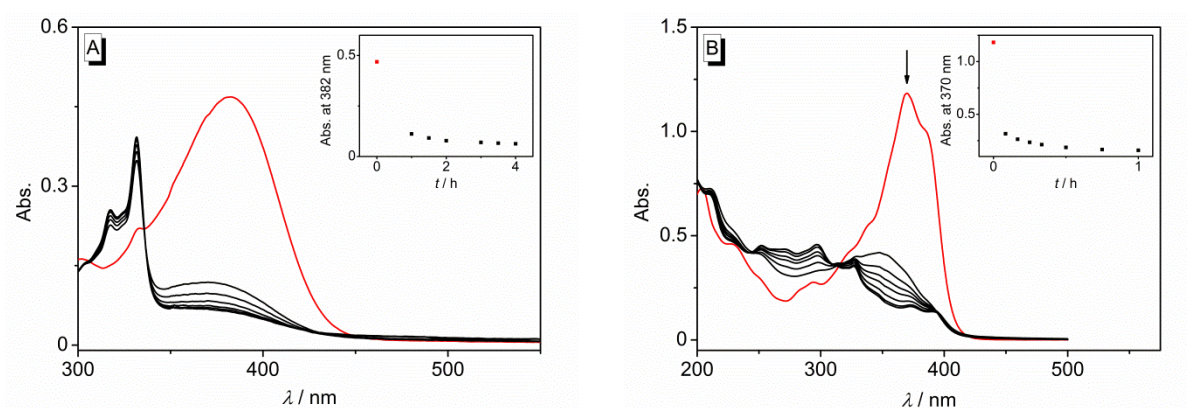

**Figure S2:** Photometric analysis of the photocycloaddition of **3c** (A, 20  $\mu\text{M}$ ) and **3d** (B, 25  $\mu\text{M}$ ) in H<sub>2</sub>O.

# Crystallographic Data

## Photodimer 4b

Data were measured using  $\phi$  and  $\omega$  scans of  $0.5^\circ$  per frame for 90 s with MoK $_{\alpha}$  radiation (microfocus sealed X-ray tube, 50 kV, 0.99 mA). The total number of runs and images was based on the strategy calculation from the program APEX3. The maximum resolution that was achieved was  $\Theta = 22.469^\circ$  (0.93 Å).

The unit cell was refined using SAINT (Bruker, V8.38A, after 2013) on 9305 reflections, 54% of the observed reflections. Data reduction, scaling and absorption corrections were performed using SAINT (Bruker, V8.38A, after 2013). The final completeness was 99.70% out to  $22.469^\circ$  in  $\Theta$ .

A multiscan absorption correction was performed using SADABS-2016/2 (Bruker, 2016/2) and used for absorption correction.  $wR_2(\text{int})$  was 0.0879 before and 0.0599 after correction. The ratio of minimum to maximum transmission was 0.7849. The  $\lambda/2$  correction factor is not present. The absorption coefficient  $\mu$  of this material was  $0.114 \text{ mm}^{-1}$  at this wavelength ( $\lambda = 0.71073 \text{ Å}$ ), and the minimum and maximum transmissions were 0.773 and 0.985.

The structure was solved in space group  $P2_1/n$  with the XT [5] structure solution program using the intrinsic phasing solution method and by using Olex2 [5] as the graphical interface.

The material crystallized with significant disorder. The orientation of one quinolizinium unit was found in two different orientations. Each fragment was refined using similarity restraints on bond lengths and angles. In addition, one BF $_4$  anion was modelled in three orientations, with restraints on all B–F bond lengths. Finally, the material crystallized with disordered solvent in the lattice. This solvent could not be modeled, therefore, the PLATON/SQUEEZE program [6] was employed to generate a ‘solvent-free’ data set. All nonhydrogen atoms were refined anisotropically. Hydrogen atom positions were calculated geometrically and refined using the riding model.

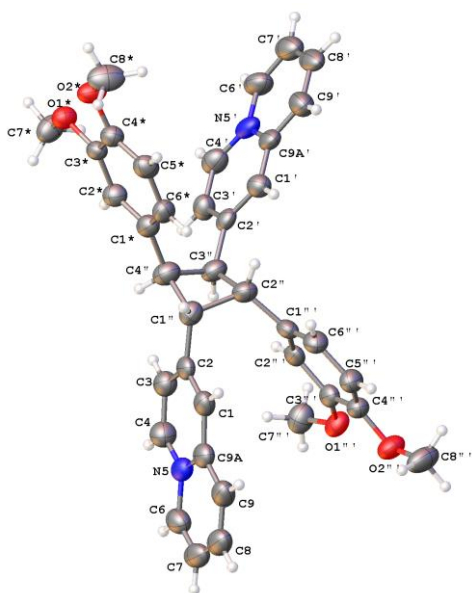

**Figure S3:** ORTEP image of the major disordered fragment of **4b**. All ellipsoids are drawn at 50% probability. The BF $_4$  anions have been removed for clarity.



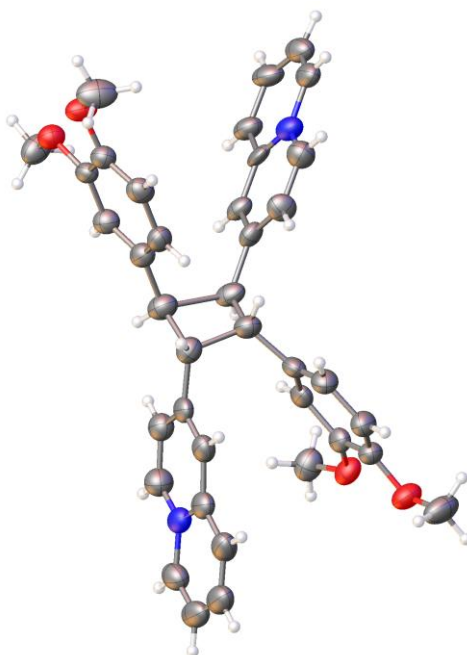

**Figure S4:** ORTEP image of the minor disordered fragment of **4b**. All ellipsoids are drawn at 50% probability. The  $\text{BF}_4$  anions have been removed for clarity.

structure quality indicators:

|              |            |       |            |      |          |       |          |       |
|--------------|------------|-------|------------|------|----------|-------|----------|-------|
| reflections: | d min (Mo) | 0.93  | $I/\sigma$ | 20.9 | Rint     | 4.31% | complete | 100%  |
| refinement:  | Shift      | 0.000 | Max Peak   | 0.8  | Min Peak | -0.3  | GooF     | 1.106 |

## Photodimer 4c

Single colorless irregular shaped crystals of **4c** were recrystallized from water by slow evaporation. The structure was solved with the XT structure solution program using the intrinsic phasing solution method and by using Olex2 [5] as the graphical interface. The model was refined with version 2018/3 of XL using least-squares minimization.

Data were measured using  $\phi$  and  $\omega$  scans of  $0.5^\circ$  per frame for 30 s using  $\text{MoK}_\alpha$  radiation (microfocus sealed X-ray tube, 50 kV, 0.99 mA). The total number of runs and images was based on the strategy calculation from the program APEX3. The maximum resolution that was achieved was  $\Theta = 26.468^\circ$  (0.80 Å).

The diffraction pattern was indexed and the unit cell was refined using SAINT (Bruker, V8.38A, after 2013) on 7034 reflections, 51% of the observed reflections. Data reduction, scaling and absorption corrections were performed using SAINT (Bruker, V8.38A, after 2013). The final completeness was 100% out to  $26.468^\circ$  in  $\Theta$ .

A multiscan absorption correction was performed using SADABS-2016/2 (Bruker, 2016/2) and used for absorption correction.  $wR_2(\text{int})$  was 0.0913 before and 0.0629 after correction. The ratio of minimum to maximum transmission was 0.8424. The  $\lambda/2$  correction factor is not present. The absorption coefficient  $\mu$  of this material was  $0.119 \text{ mm}^{-1}$  at this wavelength ( $\lambda = 0.711 \text{ Å}$ ), and the minimum and maximum transmissions were 0.628 and 0.745.

The structure was solved and the space group *P*-1 (# 2) determined by the XT [5] structure solution program using intrinsic phasing and refined by least squares using version 2018/3 of XL [5]. The material crystallized with a small fraction (ca. 7%) of near whole molecule disorder, with the two fragments related by a 180° rotation and oriented such that the methoxyphenyl and quinolizinium moieties were nearly overlapping. Modeling of the minor fraction required the use of restraints and constraints to maintain reasonable geometries. All nonhydrogen atoms were refined anisotropically. Hydrogen atom positions were calculated geometrically and refined using the riding model. The value of *Z'* was 0.5. This means that only half of the formula unit was present in the asymmetric unit, with the other half consisting of symmetry-equivalent atoms.

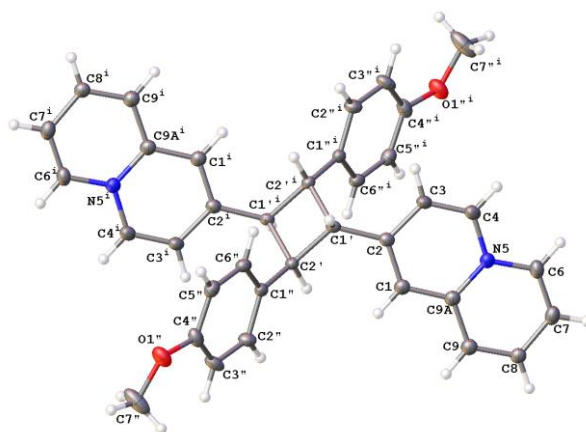

**Figure S5:** ORTEP image of the major disordered fragment of **4c**. All ellipsoids are drawn at 50% probability. The BF<sub>4</sub> anions have been removed for clarity.

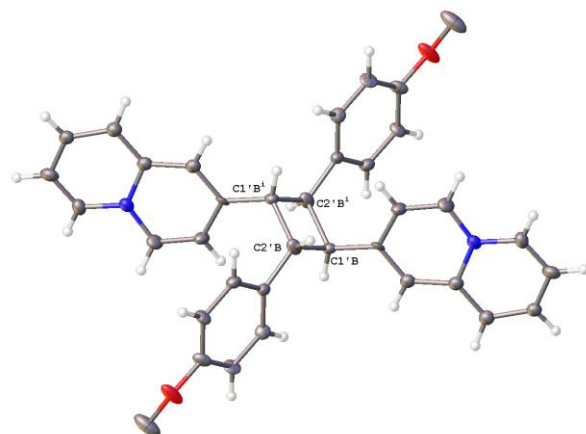

**Figure S6:** ORTEP image of the minor disordered component of **4c**. The BF<sub>4</sub> anions have been removed for clarity.

#### structure quality indicators

|              |            |       |            |      |          |       |          |       |
|--------------|------------|-------|------------|------|----------|-------|----------|-------|
| reflections: | d min (Mo) | 0.80  | $I/\sigma$ | 24.7 | Rint     | 4.69% | complete | 100%  |
| refinement:  | Shift      | 0.000 | Max Peak   | 0.3  | Min Peak | -0.4  | GooF     | 1.040 |

**Table S1:** Crystal data and structure refinement details of **4b** and **4c**.<sup>a</sup>

| compound                              | 4b                                                                                          | 4c                                                                                          |
|---------------------------------------|---------------------------------------------------------------------------------------------|---------------------------------------------------------------------------------------------|
| formula                               | C <sub>38</sub> H <sub>36</sub> B <sub>2</sub> F <sub>8</sub> N <sub>2</sub> O <sub>4</sub> | C <sub>36</sub> H <sub>32</sub> B <sub>2</sub> F <sub>8</sub> N <sub>2</sub> O <sub>2</sub> |
| D <sub>calc</sub> /g·cm <sup>-3</sup> | 1.362                                                                                       | 1.430                                                                                       |
| μ/mm <sup>-1</sup>                    | 0.114                                                                                       | 0.119                                                                                       |
| formula Wweight                       | 761.13                                                                                      | 698.25                                                                                      |
| color                                 | colorless                                                                                   | colorless                                                                                   |
| shape                                 | prism                                                                                       | irregular                                                                                   |
| size/mm <sup>3</sup>                  | 0.25·0.15·0.13                                                                              | 0.24·0.23·0.08                                                                              |
| T/K                                   | 100(2)                                                                                      | 100(2)                                                                                      |
| crystal system                        | monoclinic                                                                                  | triclinic                                                                                   |
| space group                           | <i>P</i> 2 <sub>1</sub> / <i>n</i>                                                          | <i>P</i> -1                                                                                 |
| a/Å                                   | 13.339(2)                                                                                   | 9.062(3)                                                                                    |
| b/Å                                   | 15.093(2)                                                                                   | 9.986(3)                                                                                    |
| c/Å                                   | 18.815(3)                                                                                   | 10.433(3)                                                                                   |
| α/°                                   | 90                                                                                          | 91.011(9)                                                                                   |
| β/°                                   | 101.478(4)                                                                                  | 114.226(9)                                                                                  |
| γ/°                                   | 90                                                                                          | 107.399(10)                                                                                 |
| V/Å <sup>3</sup>                      | 3712.2(9)                                                                                   | 810.8(4)                                                                                    |
| Z                                     | 4                                                                                           | 1                                                                                           |
| Z'                                    | 1                                                                                           | 0.5                                                                                         |
| wavelength/Å                          | 0.71073                                                                                     | 0.71073                                                                                     |
| radiation type                        | MoK <sub>α</sub>                                                                            | MoK <sub>α</sub>                                                                            |
| Θ <sub>min</sub> /°                   | 1.721                                                                                       | 2.166                                                                                       |
| Θ <sub>max</sub> /°                   | 22.469                                                                                      | 26.468                                                                                      |
| measured refl's                       | 17353                                                                                       | 13777                                                                                       |
| ind't refl's                          | 4833                                                                                        | 3335                                                                                        |
| refl's with I > 2(I)                  | 3516                                                                                        | 2635                                                                                        |
| R <sub>int</sub>                      | 0.0431                                                                                      | 0.0469                                                                                      |
| parameters                            | 651                                                                                         | 321                                                                                         |
| restraints                            | 1692                                                                                        | 1060                                                                                        |
| largest Peak                          | 0.824                                                                                       | 0.326                                                                                       |
| deepest Hole                          | -0.333                                                                                      | -0.400                                                                                      |
| GooF                                  | 1.106                                                                                       | 1.040                                                                                       |
| wR <sub>2</sub> (all data)            | 0.3065                                                                                      | 0.1357                                                                                      |
| wR <sub>2</sub>                       | 0.2887                                                                                      | 0.1257                                                                                      |
| R <sub>1</sub> (all data)             | 0.1460                                                                                      | 0.0635                                                                                      |
| R <sub>1</sub>                        | 0.1178                                                                                      | 0.0481                                                                                      |

<sup>a</sup>CCDC deposition numbers 1963881 (**4b**) and 1963882 (**4c**) contain the supplementary crystallographic data for these compounds. These data can be obtained at The Cambridge Crystallographic Data Centre at <https://www.ccdc.cam.ac.uk>.

## $^1\text{H}$ NMR spectra

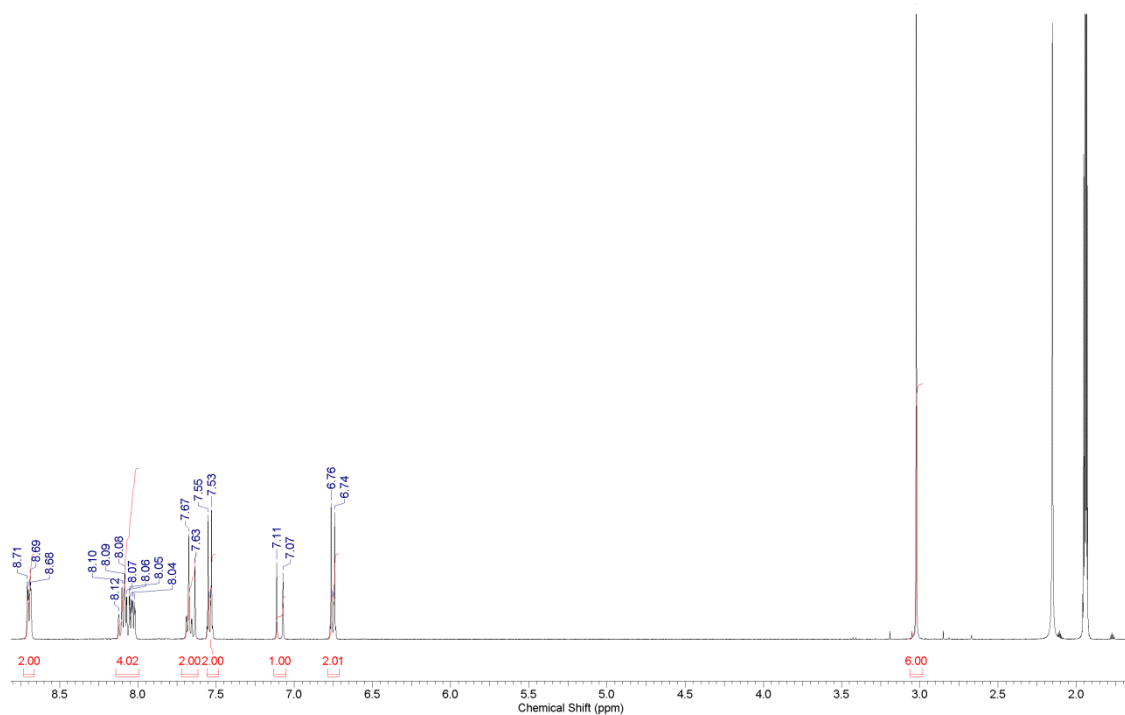

**Figure S7:**  $^1\text{H}$  NMR spectrum (400 MHz) of **3a** in  $\text{CD}_3\text{CN}$ .

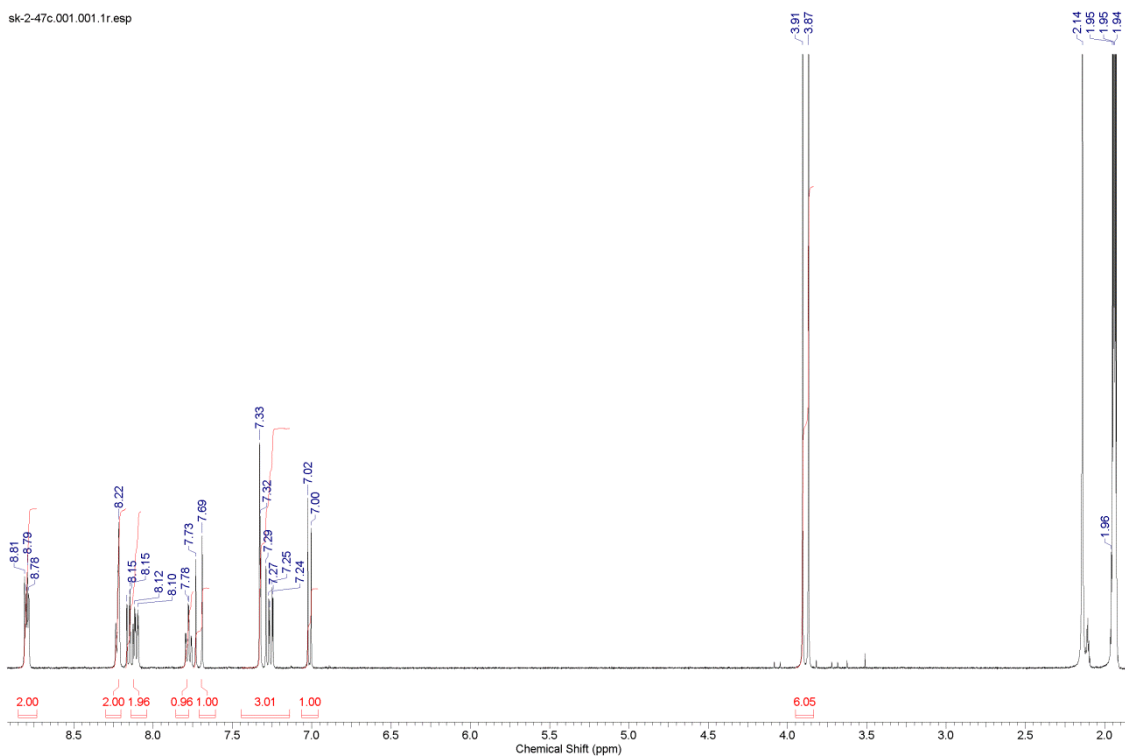

**Figure S8:**  $^1\text{H}$  NMR spectrum (600 MHz) of **3b** in  $\text{CD}_3\text{CN}$ .

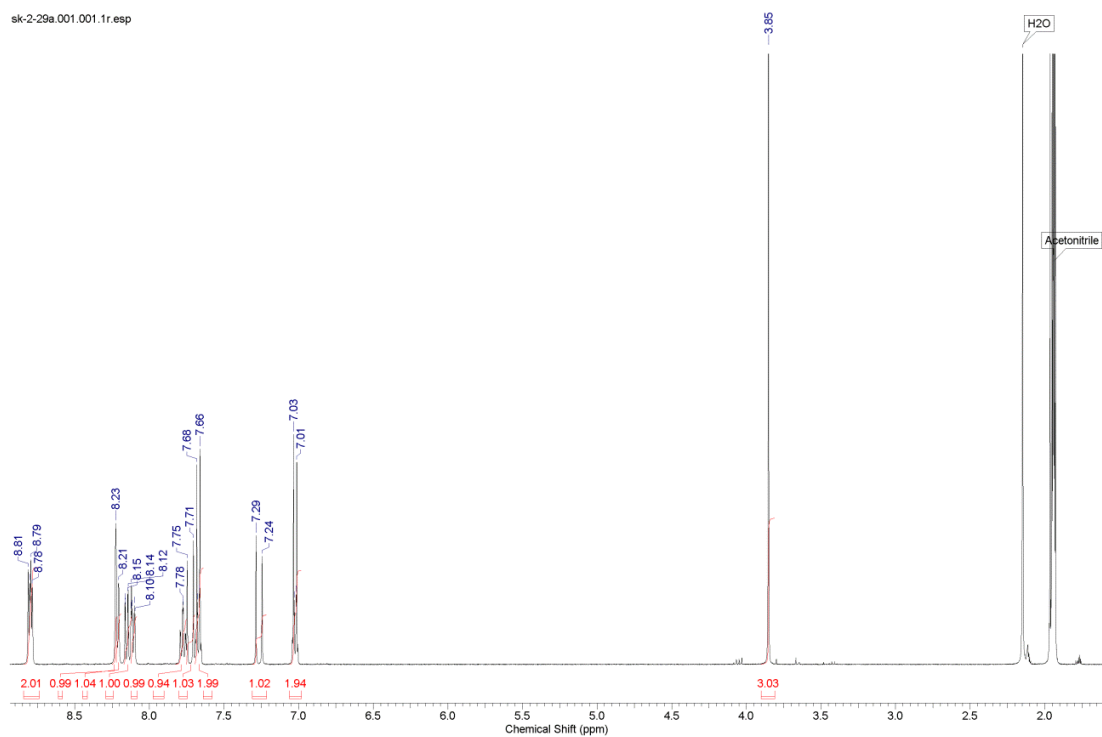

**Figure S9:** <sup>1</sup>H NMR spectrum (400 MHz) of **3c** in CD<sub>3</sub>CN.

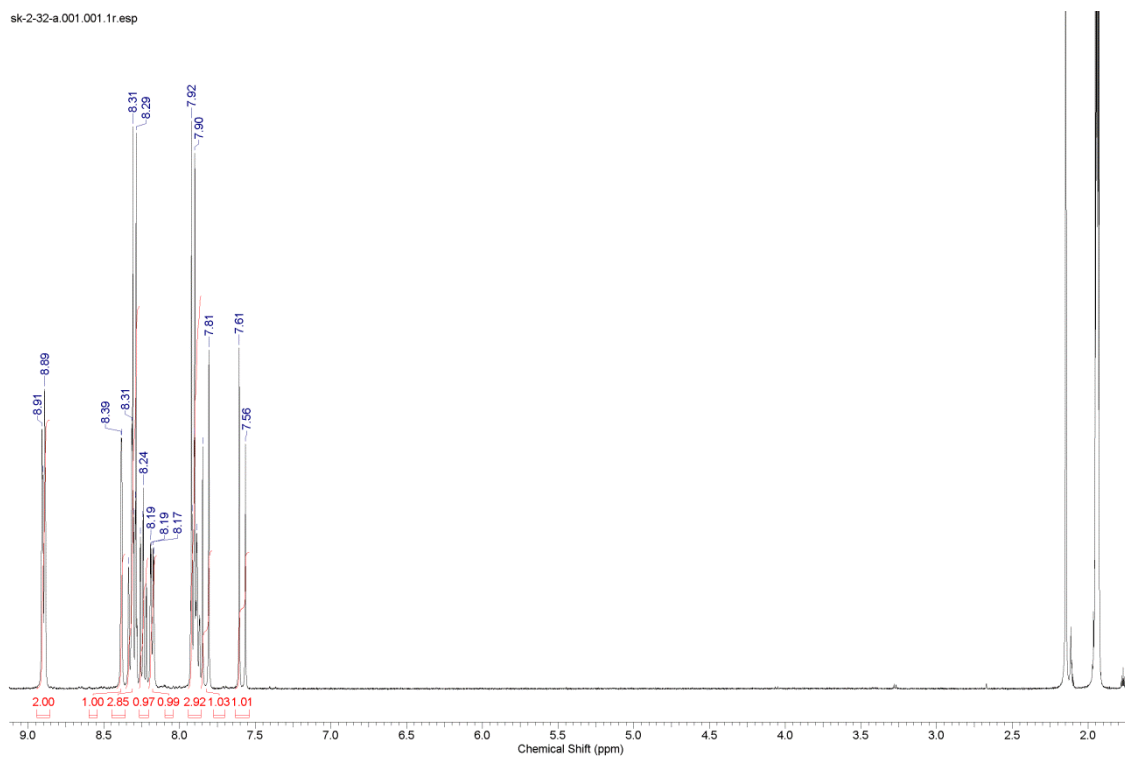

**Figure S10:** <sup>1</sup>H NMR spectrum (600 MHz) of **3d** in CD<sub>3</sub>CN.

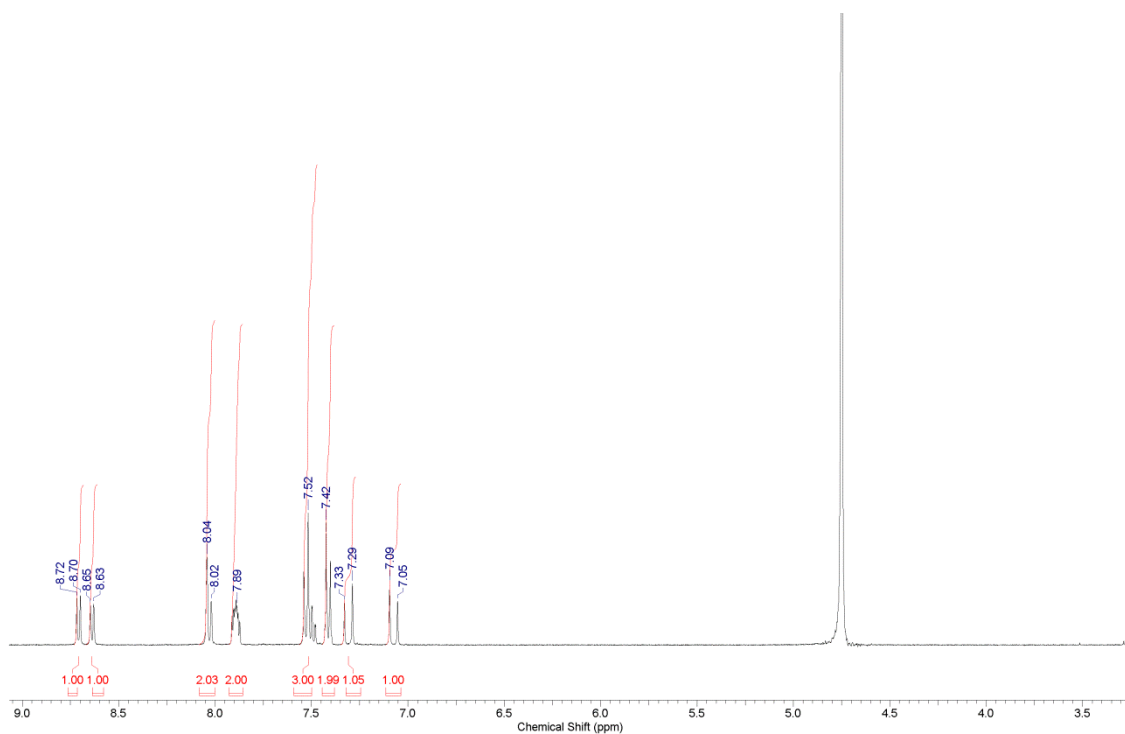

**Figure S11:**  $^1\text{H}$  NMR spectrum (400 MHz) in  $\text{D}_2\text{O}$  after irradiation of **3a** at 530 nm for 2 h.

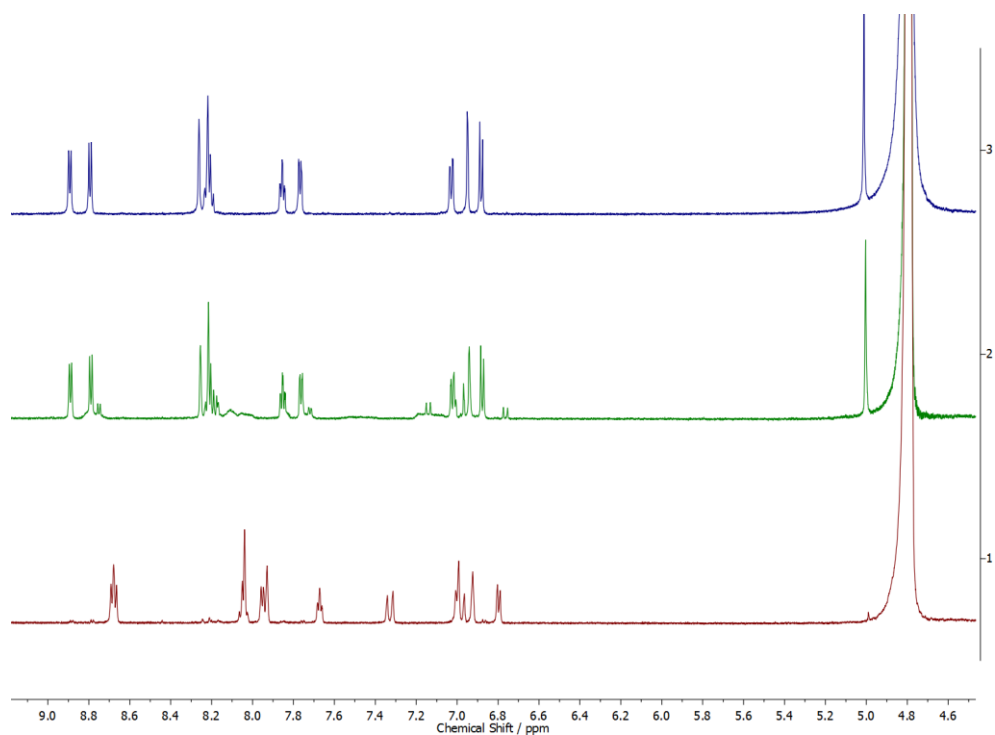

**Figure S12:** Irradiation of **3b** at ca. 450 nm (LED) in  $\text{D}_2\text{O}$  followed by  $^1\text{H}$  NMR spectroscopy (600 MHz, bottom: 0 min, middle: 1 min, top: 3 min).

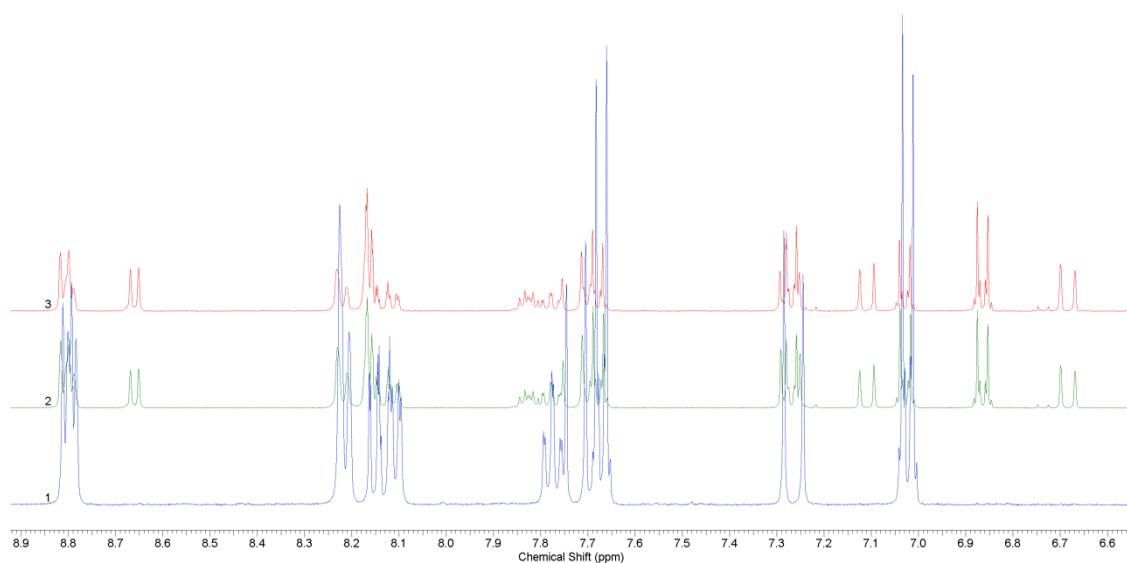

**Figure S13:** Irradiation of **3c** at ca. 530 nm (LED) in CD<sub>3</sub>CN followed by <sup>1</sup>H NMR spectroscopy (400 MHz, 1: 0 h, 2: 2 h, 3: 6 h).

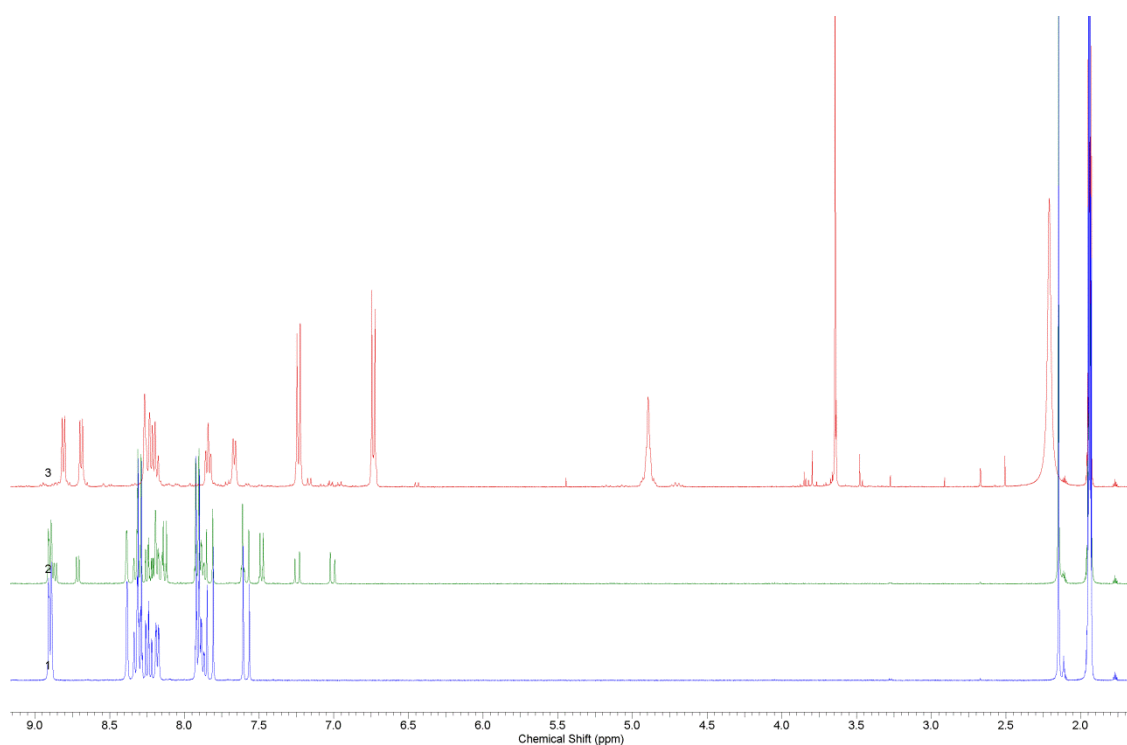

**Figure S14:** Irradiation of **3d** at 365 nm (Hg high-pressure lamp) in CD<sub>3</sub>CN followed by <sup>1</sup>H NMR spectroscopy (400 MHz, 1: 0 h, 2: 2 h, 3: 8 h).

## References

- [1] a) Beumel, O. F.; Novis Smith, W.; Rybalka, B. *Synthesis* **1974**, 1, 43–45. b) Richards, A.; Stevens, T. S. *J. Chem. Soc.* **1958**, 3067–3073.
- [2] Marcelo, G.; Pinto, S.; Caneque, T.; Mariz, I. F. A.; Cuadro, A. M.; Vaquero, J. J.; Martinho, J. M. G.; Macoas, E. M. S. *J. Phys. Chem. A* **2015**, 119, 2351–2362.
- [3] Stootman, F. H.; Fisher, D. M.; Rodger, A. Aldrich-Wright, J. R. *Analyst* **2006**, 131, 1145–1151.
- [4] a) Pithan, P. M.; Decker, D.; Druzhinin, S. I.; Ihmels, H.; Schönherr, H.; Voß, Y. *RSC Advances*, **2017**, 7, 10660–10667. b) Das, A. K.; Druzhinin, S. I.; Ihmels, H.; Müller, M.; Schönherr, H. *Chem. Eur. J.* **2019**, 25, 12703–12707.
- [5] Dolomanov, O. V.; Bourhis, L. J.; Gildea, R. J.; Howard, J. A. K.; Puschmann, H. *J. Appl. Cryst.* **2009**, 42, 339–341.
- [6] Spek, A. L. *Acta Cryst.* **2015**, C71, 9–18.
